# Supplementary material
Source: publisher figshare collection journal article supplement (https://gsapubs.figshare.com/articles/dataset/_/16814959)
Supplement: Supplementary file 1 [file 1]

## Supplemental Material

### Data sources for zircon ages from Himalayan orogen included in Figure 2C.

Booth, A.L., Zeitler, P.K., Kidd, W.S.F., Wooden, J., Li, Y., Idleman, B., Hren, M., Chamberlain, C.P. 2004. U-Pb zircon constraints on the tectonic evolution of southeastern Tibet, Namche Barwa Area. *American Journal of Science*, v. 304, p. 889–929. <https://doi.org/10.2475/ajs.304.10.889>

Bouilhol, P., Jagoutz, O., Hanchar, J.M., Dubas, F.O. 2013. Dating the India-Eurasia collision through arc magmatic records. *Earth and Planetary Science Letters*, v. 366, p. 163–175. <https://doi.org/10.1016/j.epsl.2013.01.023>

Borneman, N.L., Hodges, K.V., van Soest, M.C., Bohon, W., Wartho, J.-A., Cronk, S.S., Ahmad, T. 2015. Age and structure of the Shyok suture in the Ladakh region of northwestern India: Implications for slip on the Karakoram fault system. *Tectonics*, v. 34, p. 2011–2033. <https://doi.org/10.1002/2015TC003933>

Bosch, D., Garrido, C.J., Bruguier, O., Dhuime, B., Bodinier, J.-L., Padrón-Navarta, J.A., Galland, B. 2011. Building an island-arc crustal section: Time constraints from a LA-ICPMS zircon study. *Earth and Planetary Science Letters*, v. 309, p. 268–279. <https://doi.org/10.1016/j.epsl.2011.07.016>

Chen, L., Qin, K.-Z., Li, G.-M., Li, J.-X., Xiao, B., Zhao, J.-X., Fan, X. 2015. Zircon U-Pb ages, geochemistry, and Sr-Nd-Pb-Hf isotopes of the Nuri intrusive rocks in the Gangdese area, southern Tibet: Constraints on timing, petrogenesis, and tectonic transformation. *Lithos*, v. 212–215, p. 379–396. <https://doi.org/10.1016/j.lithos.2014.11.014>

Faisal, S., Larson, K.P., King, J., Cottle, J.M. 2016. Rifting, subduction and collisional records from pluton petrogenesis and geochronology in the Hindu Kush, NW Pakistan. *Gondwana Research*, v. 35, 286–304. <https://doi.org/10.1016/j.gr.2015.05.014>

Gao, L.-E., Zeng, L.-S., Zie, K.-J. 2011. Eocene high grade metamorphism and crustal anatexis in the North Himalaya Gneiss Domes, Southern Tibet. *Chinese Science Bulletin*, v. 57, p. 639–650. <https://doi.org/10.1007/s11434-011-4805-4>

Gao, L.-E., Zeng, L., Gao, J., Shang, Z., Hou, K., Wang, Q. 2016. Oligocene crustal anatexis in the Tethyan Himalaya, southern Tibet. *Lithos*, v. 264, p. 201–209. <https://doi.org/10.1016/j.lithos.2016.08.038>

Guan, Q., Zhu, D.-C., Zhao, Z.-D., Dong, G.-C., Zhang, L.-L., Li, Z.-W., Liu, M., Mo, X.-X., Lie, Y.-S., Yuan, H.-L., 2012. Crustal thickening prior to 38 Ma in southern Tibet: Evidence from lower crust-derived adakitic magmatism in the Gangdese Batholith. *Gondwana Research*, v. 21, p. 88–99. <https://doi.org/10.1016/j.gr.2011.07.004>

Guo, L., Zhang, H.-F., Harris, N., Pan, F.-B., Xu, W.-C. 2011. Origin and evolution of multi-stage felsic melts in eastern Gangdese belt: Constraints from U-Pb zircon dating and Hf isotopic composition. *Lithos*, v. 127, 54–67. <https://doi.org/10.1016/j.lithos.2011.08.005>

Groppo, C., Rubatto, D., Rolfo, F., Lombardo, B., 2010. Early Oligocene partial melting in the Main Central Thrust Zone (Arun valley, eastern Nepal Himalaya). *Lithos*, v. 118, p. 287–301. <https://doi.org/10.1016/j.lithos.2010.05.003>

Heuberger, S., Schaltegger, U., Burg, J.-P., Villa, I.M., Frank, M., Dawood, H., Hussain, S., Zanchi, A. 2007. Age and isotopic constraints on magmatism along the Karakoram-Kohistan Suture Zone, Nw Pakistan: evidence for subduction and continued convergence after India-Asia collision. *Swiss Journal of Geosciences*, v. 100, p. 85–107. <https://doi.org/10.1007/s00015-007-1203-7>

Horton, F. and Leech, M.L. 2013. Age and origin of granites in the Karakoram shear zone and Greater Himalaya Sequence, NW India. *Lithosphere*, v. 5, p. 300–320. <https://doi.org/10.1130/L213.1>

Hou, Z.-Q., Zheng, Y.-C., Zeng, L.-S., Gao, L.-E., Huang, K.-X., Li, W., Li, Q.-Y., Fu, Q., Liang, W., Sun, Q.-Z. 2012. Eocene-Oligocene granitoids in southern Tibet: Constraints on crustal anatexis and tectonic evolution of

- the Himalayan orogen. *Earth and Planetary Science Letters*, v. 349–350, p. 38–52.  
<https://doi.org/10.1016/j.epsl.2012.06.030>
- Jagoutz, O.E., Burg, J-P., Hussain, S., Dawood, H., Pettke, T., Iizuka, T., Maruyama, S. 2009. Construction of the granitoid crust of an island arc part I: geochronological and geochemical constraints from the plutonic Kohistan (NW Pakistan). *Contributions to Mineralogy and Petrology*, v. 158, p. 739.  
<https://doi.org/10.1007/s00410-009-0408-3>
- Ji, W-Q., Wu, F-Y., Chung, S-L., Li, J-X., Liu, C-Z. 2009. Zircon U-Pb geochronology and Hf isotopic constraints on petrogenesis of the Gangdese batholith, southern Tibet. *Chemical Geology*, v. 262, p. 229–245.  
<https://doi.org/10.1016/j.chemgeo.2009.01.020>
- Ji, W-Q., Wu, F-Y., Liu, C-Z., Chung, S-L., 2012. Early Eocene crustal thickening in southern Tibet: New age and geochemical constraints from the Gangdese batholith. *Journal of Asian Earth Sciences*, v. 53, p. 82–95.  
<https://doi.org/10.1016/j.jseas.2011.08.020>
- Jiang, Z-Q, Wang, Q., Li, Z-X., Wyman, D.A., Tang, G-J., Jia, X-H., Yang, Y-H. 2012. Late Cretaceous (ca. 90 Ma) adakitic intrusive rocks in the Kelu area, Gangdese Belt (southern Tibet): Slab melting and implications for Cu-Au mineralization. *Journal of Asian Earth Sciences*, v. 53, p. 67–81.  
<https://doi.org/10.1016/j.jseas.2012.02.010>
- Jiang, Z-Q, Wang, Q., Wyman, D.A., Li, Z-X., Yang, J-H., Shi, X-B., Ma, L., Tang, G-J., Gou, G-N., Jia, X-H., Guo, H-F. 2014. Transition from oceanic to continental lithosphere subduction in southern Tibet: Evidence from the Late Cretaceous-Early Oligocene (~91-30 Ma) intrusive rocks in the Chanag-Zedon area, southern Gangdese. *Lithos*, v. 196–197, p. 213–231. <https://doi.org/10.1016/j.lithos.2014.03.001>
- Kawakami, T., Aoya, M., Wallis, S.R., Lee, J., Terada, K., Wang, Y., Heizler, M. 2007. Contact metamorphism in the Malashan dome, North Himalayan gneiss domes, southern Tibet: an example of shallow extensional tectonics in the Tethys Himalaya. *Journal of Metamorphic Geology*, v. 25, p. 831–853.  
<https://doi.org/10.1111/j.1525-1314.2007.00731.x>
- Kellett, D.A., Grukic, D., Coutand, I., Cottle, J., Mukul, M., 2013. The South Tibetan detachment system facilitates ultra rapid cooling of granulite-facies rocks in Sikkim Himalaya. *Tectonics*, v. 32., p. 252–270.  
<https://doi.org/10.1002/tect.20014>
- King, J., Harris, N., Argles, T., Parrish, R., Zhang, H. 2011. Contribution of crustal anatexis to the tectonic evolution of Indian crust beneath southern Tibet. *Geological Society of American Bulletin*, v. 123, p. 218–239.  
<https://doi.org/10.1130/B30085.1>
- Larson, K.P., Godin, L., Davis, W.J., Davis, D.W. 2010. Out-of-sequence deformation and expansion of the Himalayan orogenic wedge: insight from the Changgo culmination, south central Tibet. *Tectonics*, v. 29, p. TC4013. <https://doi.org/10.1029/2008TC002393>
- Lee, J. and Whitehouse, M.J. 2007. Onset of mid-crustal extensional flow in southern Tibet: Evidence from U/Pb zircon ages. *Geology*, v. 35, p. 45–48. <https://doi.org/10.1130/G22842A.1>
- Li, J-X., Qin, K-Z., Li, G-M., Xiao, B., Chen, L., Zhao, J-X. 2011. Post-collisional ore-bearing adakitic porphyries from Gangdese porphyry copper belt, southern Tibet: Melting of thickened juvenile arc lower crust. *Lithos*, v. 126, p. 265–277. <https://doi.org/10.1016/j.lithos.2011.07.018>
- Liu, Z-C., Wu, F-Y., Ji, W-Q., Wang, J-G., Liu, C-Z. 2014. Petrogenesis of the Ramba leucogranite in the Tethyan Himalaya and constraints on the channel flow model. *Lithos*, v. 208–209, p. 118–136.  
<https://doi.org/10.1016/j.lithos.2014.08.022>
- Ma, L., Wang, Q., Li, Z-X., Wyman, D.A., Jiang, Z-Q., Yang, J-H., Gou, G-N., Guo, H-F. 2013. Early Late Cretaceous (ca. 93 Ma) norites and hornblendites in the Milin area, eastern Gangdese: Lithosphere-aesthenosphere interaction during slab roll-back and an insight into early Late Cretaceous (ca. 100-80 Ma) magmatic “flare-up” in southern Lasa (Tibet). *Lithos*, v. 172–173, p. 17–30.  
<https://doi.org/10.1016/j.lithos.2013.03.007>

- Ma, L., Wang, B-D., Jiang, Z-Q., Wang, Q., Li, Z-X., Wyman, D.A., Zhao, S-R., Yang, J-H., Gou, G-N., Guo, H-F. 2014. Petrogenesis of the Early Eocene adakitic rocks in the Napuri area, southern Lhasa: Partial melting of thickened lower crust during slab break-off and implications for crustal thickening in southern Tibet. *Lithos*, v. 196–197, p. 321–338. <https://doi.org/10.1016/j.lithos.2014.02.011>
- Mahar, M. A., Maheo, G., Goodell, P.C., Pavlis, T.L. 2014. Age and origin of post collision Baltoro granites, south Karakoram, North Pakistan: Insights from in-situ U-Pb, Hf and oxygen isotopic record of zircons. *Lithos*, v. 205, p. 341–358. <https://doi.org/10.1016/j.lithos.2014.07.014>
- Phillips, R. J., Searle, M.P., Parrish, R.R. 2013. The geochemical and temporal evolution of the continental lithosphere and its relationship to continental-scale faulting: The Karakoram Fault, eastern Karakoram, NW Himalayas. *Geochemistry, Geophysics, Geosystems*, v. 13, p. 583–603. <https://doi.org/10.1002/ggge.20061>
- Quidelleur, X., Grove, M., Lovera, O.M., Harrison, T.M., Yin, A., Ryerson, F.J., 1997. Thermal evolution and slip history of the Renbu Zedong Thrust, southeastern Tibet. *Journal of Geophysical Research, Solid Earth*, v. 102, p. 2659–2679. <https://doi.org/10.1029/96JB02483>
- Ravikant, V., Wu, F-Y., Ji, W-Q. 2009. Zircon U-Pb and Hf isotopic constraints on petrogenesis of the Cretaceous-Tertiary granites in eastern Karakoram and Ladakh, India. *Lithos*, v. 110, p. 153–166. <https://doi.org/10.1016/j.lithos.2008.12.013>
- Rubatto, D., Chakraborty, S., Dasgupta, S., 2013. Timescales of crustal melting in the Higher Himalayan Crystallines (Sikkim, Eastern Himalaya) inferred from trace element-constrained monazite and zircon chronology. *Contributions to Mineralogy and Petrology*, v. 165, p. 349–372. <https://doi.org/10.1007/s00410-012-0812-y>
- Schaltegger, U., Zeilinger, G., Frank, M., Burg, J-P. 2002. Multiple mantle sources during island arc magmatism: U-Pb and Hf isotopic evidence from the Kohistan arc complex, Pakistan. *Terra Nova*, v. 14, p. 461–468. <https://doi.org/10.1046/j.1365-3121.2002.00432.x>
- Schärer, U., Copeland, P., Harrison, T.M., Searle, M.P. 1990. Age, Cooling History, and Origin of Post-Collisional Leucogranites in the Karakoram Batholith; A Multi-System Isotope Study. *The Journal of Geology*, v. 98, p. 233–251. <https://doi.org/10.1086/629395>
- Searle, M.P., Parrish, R.R., Thow, A.V., Noble, S.R., Phillips, R.J., Waters, D.J. 2010. Anatomy, age and evolution of a collisional mountain belt: the Baltoro granite batholith and Karakoram Metamorphic Complex, Pakistani Karakoram. *Journal of the Geological Society*, v. 167, p. 183–202. <https://doi.org/10.1144/0016-76492009-043>
- Singh, S., Protracted zircon growth in migmatites and In situ melt of Higher Himalayan Crystallines: U-Pb ages from Bhagirathi valley, NW Himalaya, India. *Geoscience Frontiers*, v. 10, p. 793–809. <https://doi.org/10.1016/j.gsf.2017.12.014>
- Streule, M.J., Searle, M.P., Waters, D.J., Horstwood, M.S.A. 2010. Metamorphism, melting, and channel flow in the Greater Himalayan Sequence and Makalu leucogranite: Constraints from thermobarometry, metamorphic modelling, and U-Pb geochronology. *Tectonics*, v. 29, TC5011. <https://doi.org/10.1029/2009TC002533>
- Viskupic, K., Hodges, K.V., Bowring, S.A., Timescales of melt generation and the thermal evolution of the Himalayan metamorphic core, Everest region, eastern Nepal. *Contributions to Mineralogy and Petrology*, v. 149, p. 1–21. <http://doi.org/10.1007/s00410-004-0628-5>
- Weinberg, R.F., Dunlap, W.J., Whitehouse, M. 2000. New field, structural and geochronological data from the Shyok and Nubra valleys, northern Ladakh: linking Kohistan to Tibet. *Geological Society, London, Special Publication*, v. 170, p. 253–275. <https://doi.org/10.1144/GSL.SP.2000.170.01.14>
- Wen, D-R., Liu, D., Chung, S-L., Chu, M-F., Jianqing, J., Zhang, Q., Song, B., Lee, T-Y., Yeh, M-W., Lo, C-H., 2008. Zircon SHRIMP U-Pb ages of the Gangdese Batholith and implications for Neotethyan subduction in southern Tibet. *Chemical Geology*, v. 252, p. 191–201. <https://doi.org/10.1016/j.chemgeo.2008.03.003>

Zeng, L., Gao, L-E., Tang, S., Hou, K., Guo, C., Hu, G. 2014. Eocene magmatism in the Tethyan Himalaya, southern Tibet. Geological Society, London, Special Publications, v. 412, p. 287–316. <https://doi.org/10.1144/SP412.8>

Zhang, Z., Dong, X., Xiang, H., Liou, J.G., Santosh, M. 2013. Building of the Deep Gangdese Arc, South Tibet: Paleocene Plutonism and Granulite-Facies Metamorphism. *Journal of Petrology*, v. 54, p. 2547–2580. <https://doi.org/10.1093/petrology/egt056>

Zhang, L-Y., Ducea, M.N., Ding, L., Pullen, A., Kapp, P. Hoffman, D. 2014. Southern Tibetan Oligocene-Miocene adakites: A record of Indian slab tearing. *Lithos*, v. 210–211, p. 209–223. <https://doi.org/10.1016/j.lithos.2014.09.029>

Zheng, Y-C., Hou, Z-Q., Fu, Q., Zhu, D-C., Liang, W., Xu, P. 2016. Mantle inputs to Himalayan anatexis: Insights from petrogenesis of the Miocene Langkazi leucogranite and its dioritic enclaves. *Lithos*, v. 264, p. 125–140. <https://doi.org/10.1016/j.lithos.2016.08.019>

Zhu, D-C., Zhao, Z-D., Niu, Y., Mo, X-X., Chung, S-L., Hou, Z-Q., Wang, L-Q., Wu, F-Y., 2011. The Lhasa Terrane: Record of a microcontinent and its histories of drift and growth. *Earth and Planetary Science Letters*, v. 301, p. 241–255. <https://doi.org/10.1016/j.epsl.2010.11.005>

Zhu, D-C., Wang, Q., Zhao, Z-D., Chung, S-L., Cawood, P.A., Niu, Y., Liu, S-A., Wu, F-Y., Mo, X-X., 2015. Magmatic record of India-Asia collision. *Scientific Reports*, v. 5, 14289. <https://doi.org/10.1038/srep14289>

Zhu, D-C., Wang, Q., Chung, S-L., Cawood, P.A., Zhao, Z-D., 2019. Gangdese magmatism in southern Tibet and India–Asia convergence since 120 Ma. In: Treloar, P.J., and Searle, M.P. (eds.) *Himalayan Tectonics: A Modern Synthesis*. Geological Society, London, Special Publications, v. 483, p. 583–604. <https://doi.org/10.1144/SP483.14>

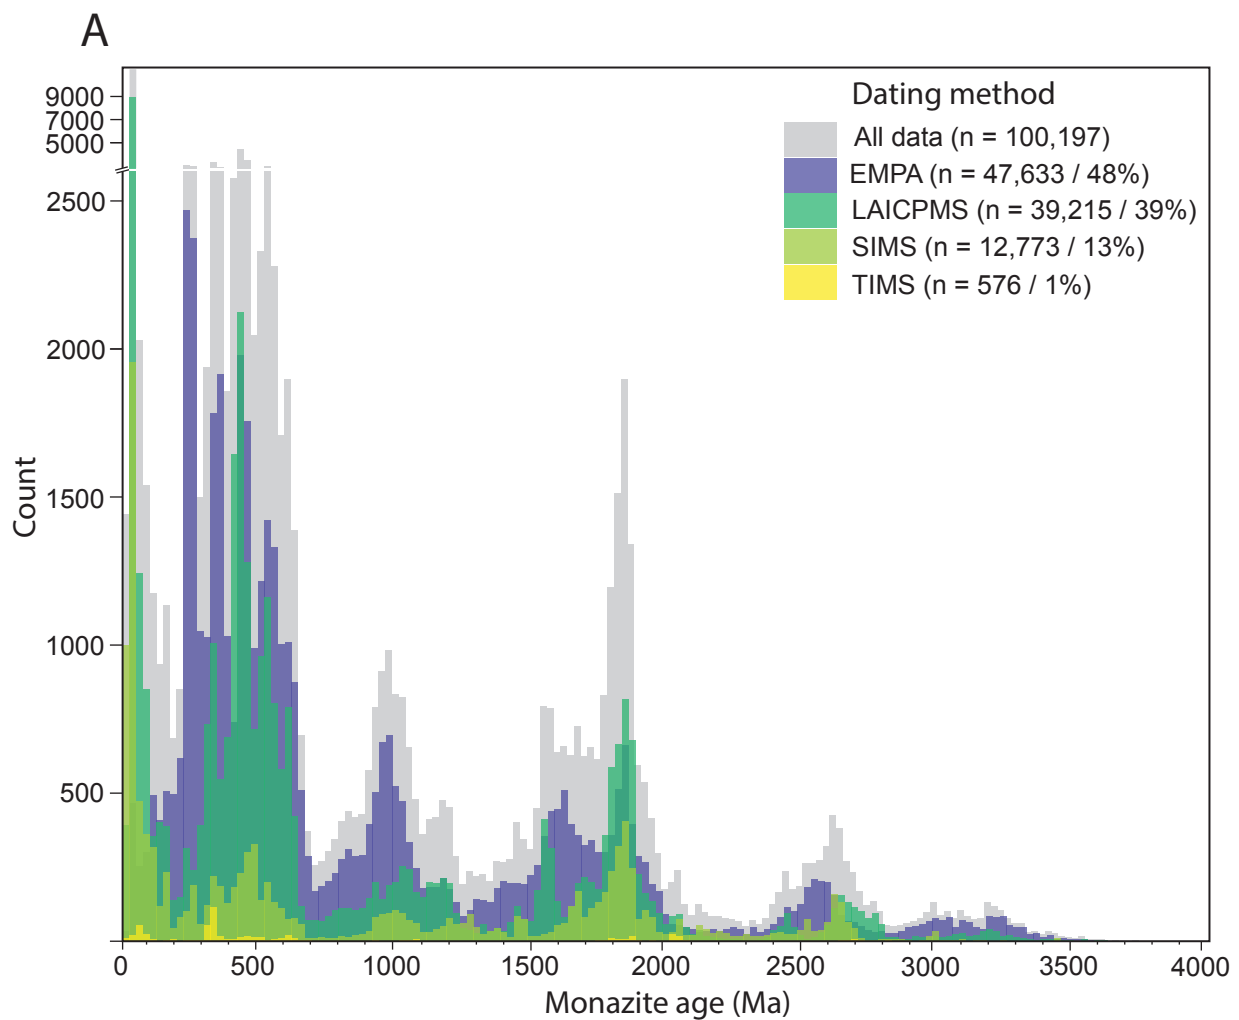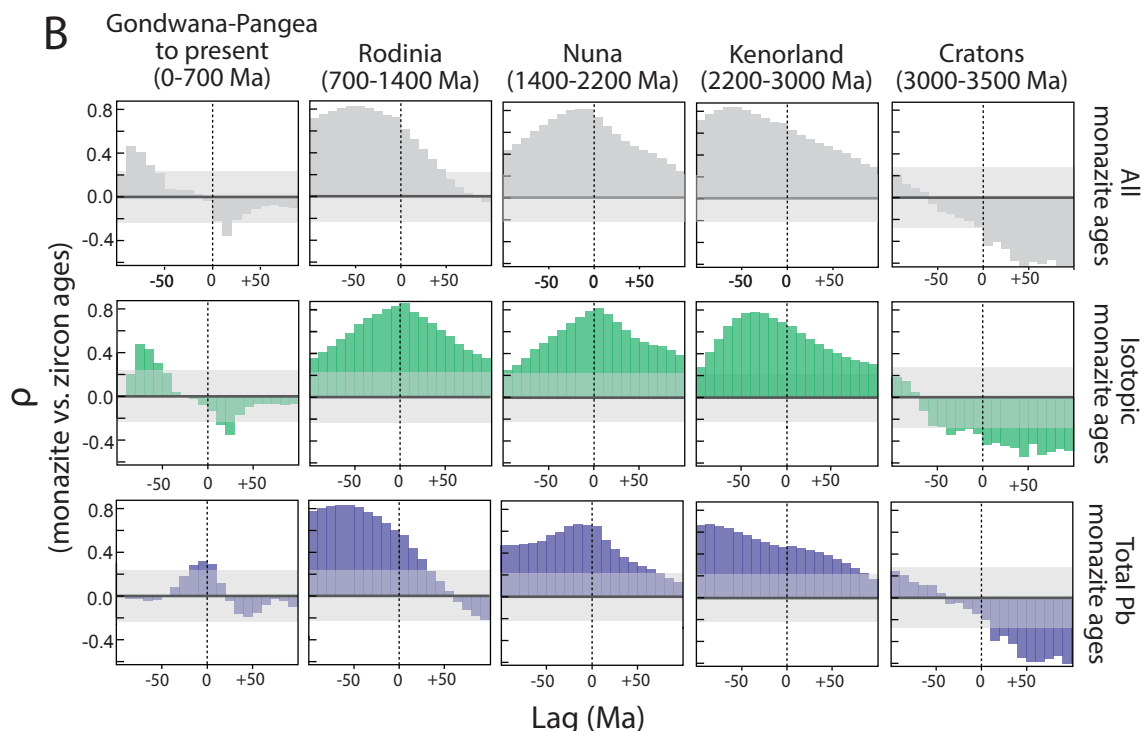

Figure S1: **A:** Stacked histograms of monazite ages from global compilation classified by dating method. EMPA — Electron microprobe analyzer; LAICPMS — Laser ablation inductively coupled plasma mass spectrometry; SIMS — Secondary ion mass spectrometry; TIMS — Thermal ionization mass spectrometry. **B:** Results of cross-correlation analysis comparing all monazite ages (All data), monazite isotopic ages (LAICPMS, SIMS, TIMS data), and monazite total Pb ages (EMPA data) to detrital zircon ages (zircon ages from Puetz and Condie, 2019). The similarity of histograms and results of cross-correlation analysis demonstrate that our interpretations based on comparing zircon and monazite age distributions are not dependent on the type of monazite dating technique included in the analysis.
